# Supplementary material for: Genetic and phenotypic landscape of the mitochondrial genome in the Japanese population
Source: PubMed Central journal article supplement (PMC7058612; doi:10.1038/s42003-020-0812-9), 2020-03-05
Supplement: 42003_2020_812_MOESM5_ESM.pdf [file 42003_2020_812_MOESM5_ESM.pdf]

# **Genetic and phenotypic landscape of the mitochondrial genome in the Japanese population**

**Supplementary Figure 1. The results of the mitochondrial genome sequencing of the Japanese population.**

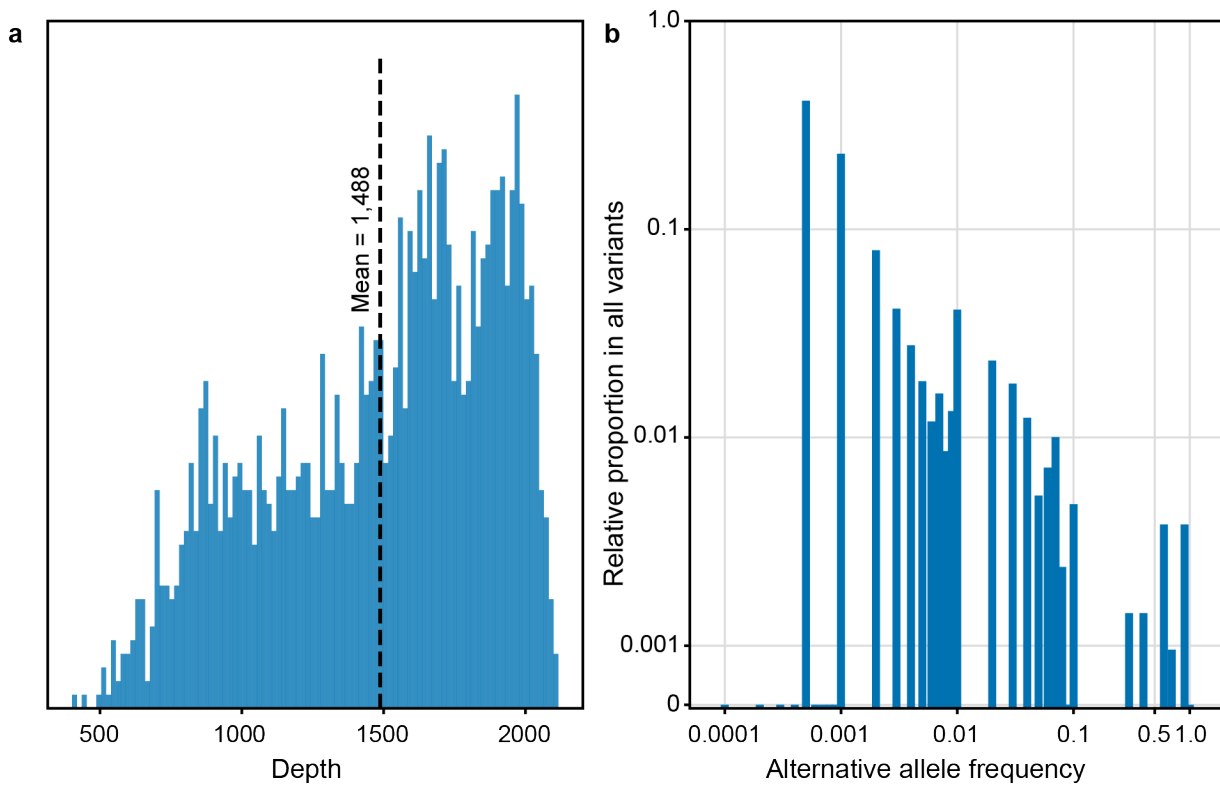

**(a)** The distribution of the depth of each sample of the mitochondrial genome sequencing. The vertical dash line represents mean depth. **(b)** Alternative allele frequency spectrum of the variants identified in the whole mitochondrial genome sequence analysis of the Japanese population.

**Supplementary Figure 2. The comparison of the alternative allele frequency spectra with other mtDNA variant databases of the Japanese population.**

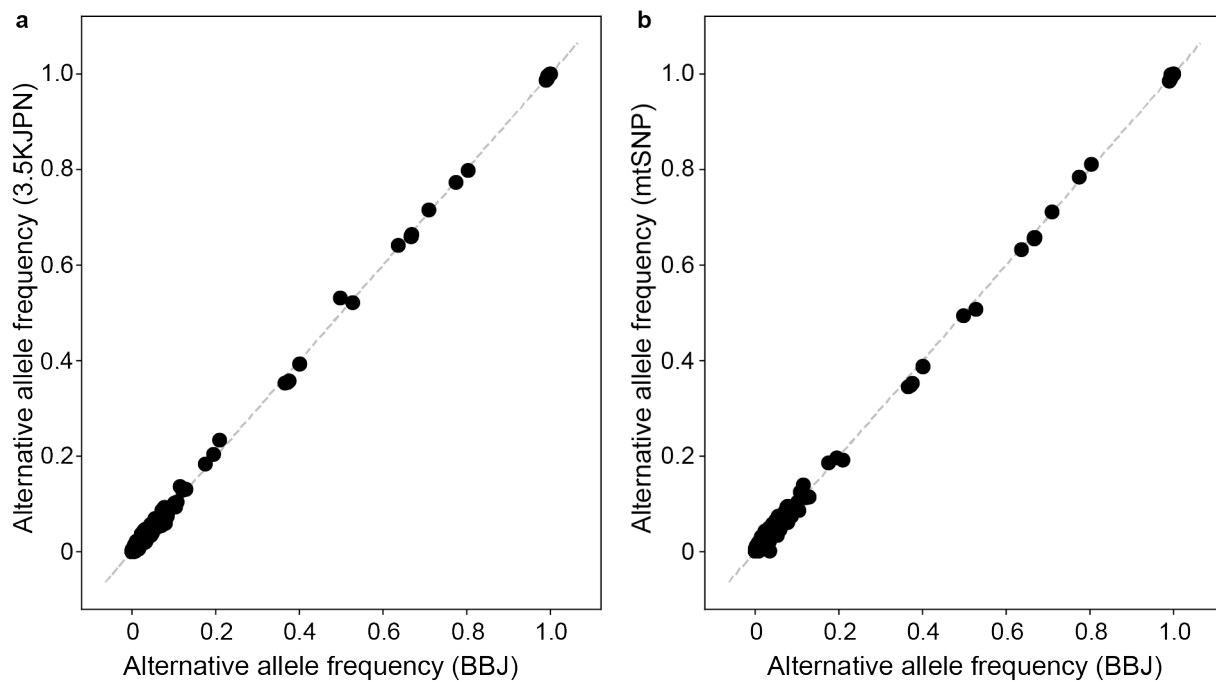

The comparison of the alternative allele frequency spectra of the mtDNA variants identified in the mitochondrial genome sequencing with (a) 3.5KJPN and (b) GiiB-JST mtSNP databases, respectively.

**Supplementary Figure 3. Mutational spectrum of the mtDNA variants.**

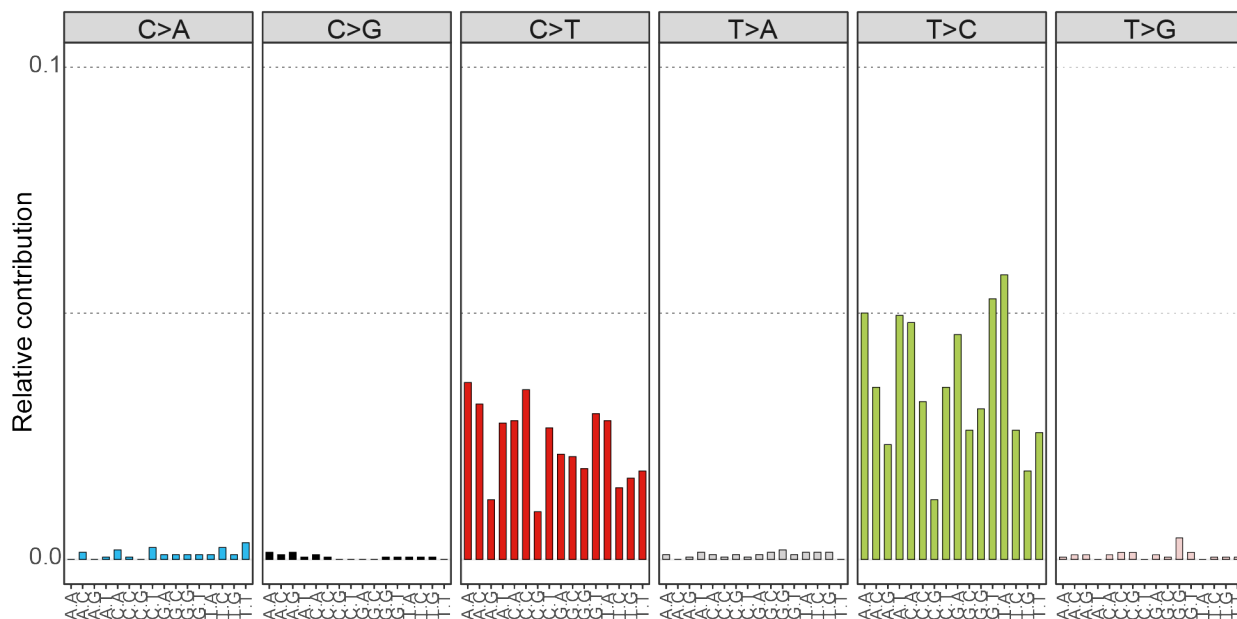

Mutational spectrum of the mtDNA variants identified by using the mitochondrial genome sequencing of the Japanese individuals.

**Supplementary Figure 4. The geographical region map of Japan.**

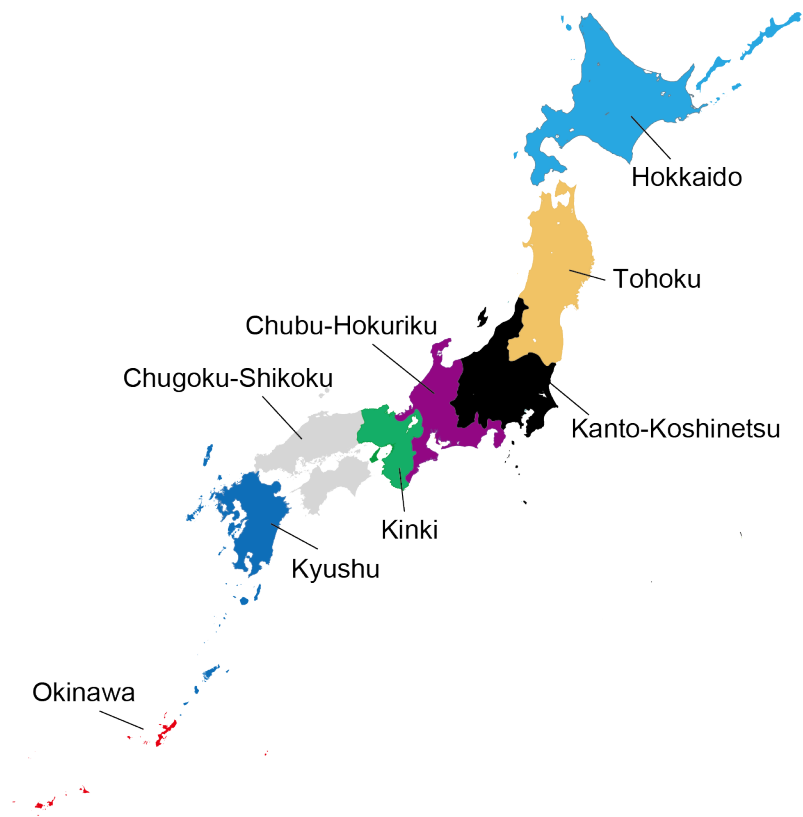

**Supplementary Figure 5. Frequency distribution of the sub-haplogroup per geographical region in Japan.**

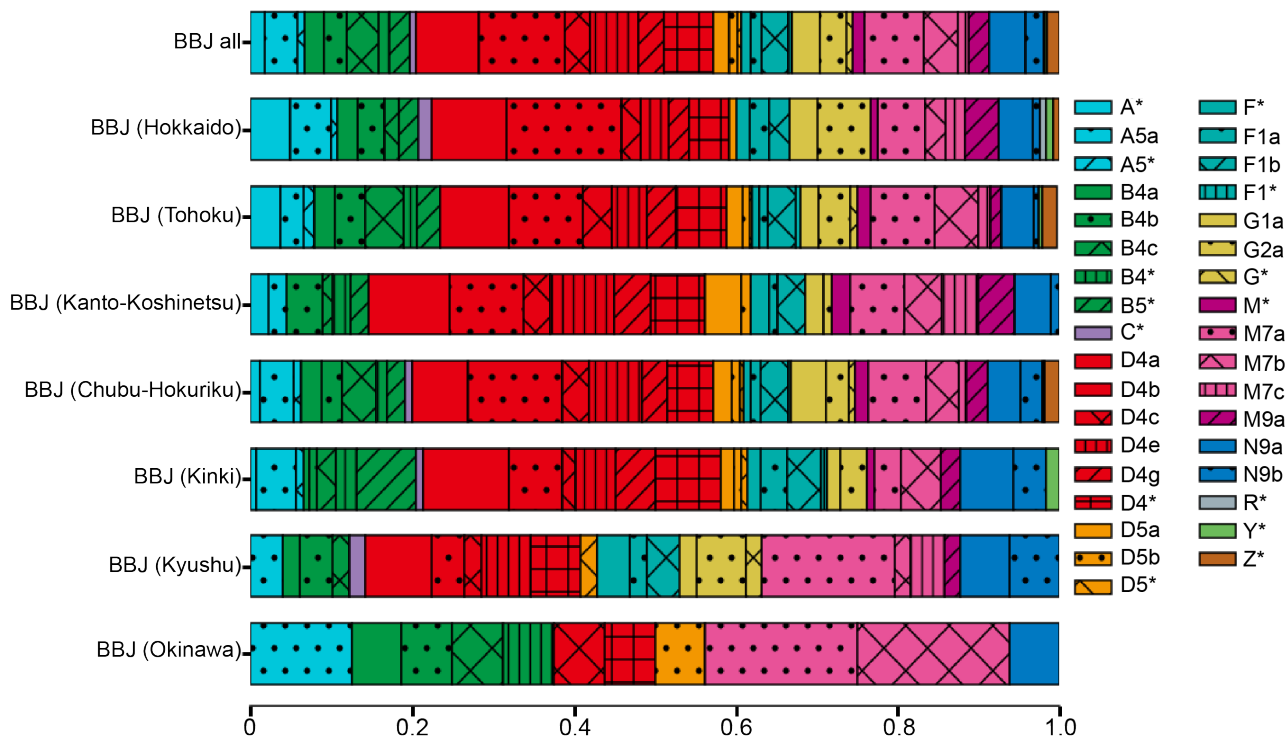

The stacked bar plot of the frequency of sub-haplogroup (3 letters) per geographical region in Japan. The sub-haplogroups less than 1% were assembled in the previous sub-haplogroups. (i.e. “A\*”, “A5\*”, “B4\*”, “B5\*”, “C\*”, “D4\*”, “D5\*”, “F\*”, “F1\*”, “G\*”, “M\*”, “R\*”, “Y\*”, and “Z”)

**Supplementary Figure 6. The pairwise plots of the top 10 PCs in the mtDNA variants.**

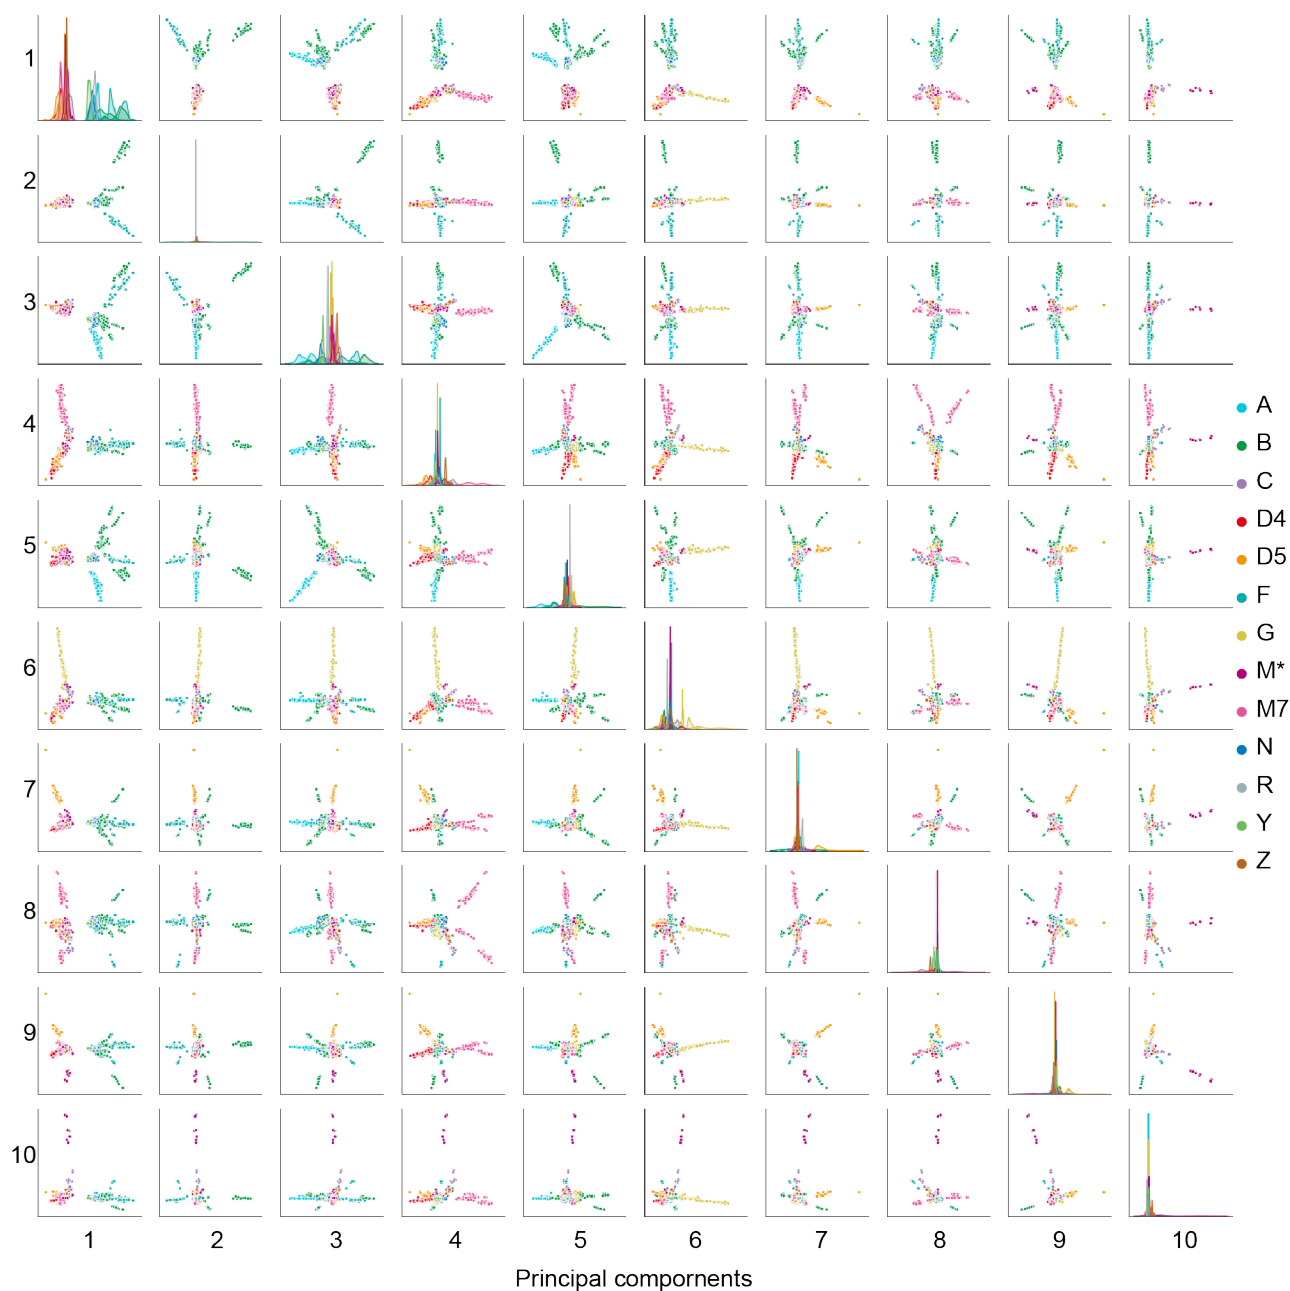

The x- and y-axes represent principal components of the mtDNA variants of the Japanese individuals. Color annotation was based on the haplogroup classifications.
